# Supplementary material for: Periostin-Binding DNA Aptamer Treatment Ameliorates Peritoneal Dialysis-Induced Peritoneal Fibrosis
Source: PubMed Central journal article supplement — Mol Ther Nucleic Acids. 2017 May 8;7:396–407. doi: 10.1016/j.omtn.2017.05.001 (PMC5436072; doi:10.1016/j.omtn.2017.05.001), 2017-05-08

**OMTN, Volume 7**

## **Supplemental Information**

### **Periostin-Binding DNA Aptamer Treatment**

### **Ameliorates Peritoneal Dialysis-Induced**

### **Peritoneal Fibrosis**

**Bo Young Nam, Jung Tak Park, Young Eun Kwon, Jung Pyo Lee, Jong Ha Jung, Youndong Kim, Seonghun Kim, Jimin Park, Jae Eun Um, Meiyan Wu, Seung Hyeok Han, Tae-Hyun Yoo, and Shin-Wook Kang**

**Supplementary Figure 1. Relative amount of PA bound to the peritoneum of mice treated with intraperitoneal PA.** The relative amount of PA detected in the peritoneal tissue was significantly higher when delivered at a dose of 500  $\mu\text{g}/\text{kg}/\text{d}$  than 100  $\mu\text{g}/\text{kg}/\text{d}$ . The amount of aptamer detected did not increase further when delivered at a dose of 1000  $\mu\text{g}/\text{kg}/\text{d}$ . The PA was given through the PD catheter mixed with saline in a final volume of 2 ml. The peritoneum was harvested after 24 hr of PA treatment. Amount of PA in the peritoneal tissue was evaluated by PCR (n = 4).

Un, untreated. \*,  $P < 0.01$  vs. untreated.

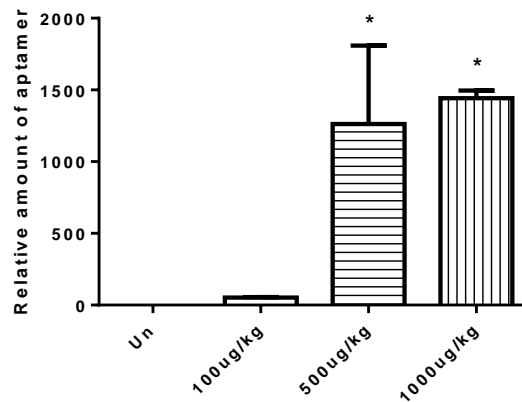

Supplement: mmc1.pdf [file mmc1.pdf]
